# Supplementary material for: Pore characteristics and preservation mechanism of over-6000-m ultra-deep shale reservoir in the Sichuan Basin
Source: Frontiers journal article supplement (doi:10.3389/feart.2023.1059869), 2023-02-02
Supplement: Table_3.xlsx [file Table_3.xlsx]

## Sheet: Micropores 
Sample	Formation	D5+	D5-	D0	D1	D2	D0-D1	ΔD	H	α5+	α5-	Δα	Δf
C2	Longmaxi	0.581	1.659	1.003	0.882	0.761	0.121	1.078	0.8805	0.476	1.991	1.515	-0.057
C4	Longmaxi	0.624	1.85	1.003	0.898	0.792	0.105	1.226	0.896	0.516	2.215	1.699	-0.06
C6	Longmaxi	0.611	1.815	1.003	0.893	0.783	0.11	1.204	0.8915	0.516	2.178	1.662	-0.072
C10	Qiongzhusi	0.581	1.455	1.003	0.883	0.762	0.12	0.874	0.881	0.476	1.739	1.263	-0.021
C13	Qiongzhusi	0.608	1.217	1.003	0.893	0.782	0.11	0.609	0.891	0.5	1.399	0.899	0.235
C16	Qiongzhusi	0.571	2.045	1.003	0.878	0.752	0.125	1.474	0.876	0.467	2.41	1.943	0.169
C20	Qiongzhusi	0.639	1.643	1.003	0.906	0.809	0.097	1.004	0.9045	0.529	1.968	1.439	-0.077
C22	Qiongzhusi	0.602	1.78	1.003	0.891	0.778	0.112	1.178	0.889	0.495	2.136	1.641	-0.065
C26	Qiongzhusi	0.647	1.235	1.003	0.907	0.81	0.096	0.588	0.905	0.541	1.426	0.885	0.157
C28	Qiongzhusi	0.674	1.595	1.003	0.918	0.833	0.085	0.921	0.9165	0.567	1.926	1.359	-0.202

## Sheet: Meso-macropores
Sample	Formation	D5+	D5-	D0	D1	D2	D0-D1	H	ΔD	α5+	α5-	Δα	Δf
C1	Longmaxi	0.52	1.837	1.003	0.835	0.666	0.168	0.84	1.317	0.431	2.23	1.799	-0.206
C2	Longmaxi	0.501	1.933	1.003	0.827	0.65	0.176	0.83	1.432	0.414	2.329	1.915	-0.109
C3	Longmaxi	0.421	1.312	1.003	0.789	0.574	0.214	0.78	0.891	0.342	1.527	1.185	0.208
C4	Longmaxi	0.446	1.832	1.003	0.799	0.595	0.204	0.8	1.386	0.364	2.176	1.812	0.071
C5	Longmaxi	0.486	1.662	1.003	0.823	0.486	0.18	0.82	1.176	0.397	2.05	1.653	-0.327
C6	Longmaxi	0.422	1.461	1.003	0.786	0.569	0.217	0.78	1.039	0.344	1.787	1.443	-0.327
C7	Longmaxi	0.39	1.797	1.003	0.769	0.534	0.234	0.77	1.407	0.317	2.09	1.773	0.309
C8	Qiongzhusi	0.462	1.888	1.003	0.809	0.614	0.194	0.807	1.426	0.378	2.214	1.836	0.218
C9	Qiongzhusi	0.47	1.84	1.003	0.813	0.623	0.19	0.8115	1.37	0.384	2.186	1.802	0.067
C10	Qiongzhusi	0.477	2.185	1.003	0.817	0.631	0.186	0.8155	1.708	0.39	2.631	2.241	-0.092
C11	Qiongzhusi	0.527	1.812	1.003	0.84	0.676	0.163	0.838	1.285	0.437	2.191	1.754	-0.158
C12	Qiongzhusi	0.503	1.787	1.003	0.832	0.661	0.171	0.8305	1.284	0.412	2.151	1.739	-0.084
C13	Qiongzhusi	0.413	1.857	1.003	0.781	0.559	0.222	0.7795	1.444	0.336	2.206	1.87	0.082
C14	Qiongzhusi	0.474	2.18	1.003	0.813	0.623	0.19	0.8115	1.706	0.39	2.585	2.195	0.105
C15	Qiongzhusi	0.513	1.432	1.003	0.834	0.665	0.169	0.8325	0.919	0.424	1.658	1.234	0.229
C16	Qiongzhusi	0.462	1.745	1.003	0.806	0.609	0.197	0.8045	1.283	0.379	2.109	1.73	-0.126
C17	Qiongzhusi	0.453	1.802	1.003	0.804	0.604	0.199	0.802	1.349	0.37	2.234	1.864	-0.399
C18	Qiongzhusi	0.486	1.66	1.003	0.822	0.64	0.181	0.82	1.174	0.399	2.006	1.607	-0.119
C19	Qiongzhusi	0.551	2.022	1.003	0.847	0.691	0.156	0.8455	1.471	0.463	2.674	2.211	-0.186
C20	Qiongzhusi	0.533	1.967	1.003	0.841	0.679	0.162	0.8395	1.434	0.444	2.333	1.889	0.044
C21	Qiongzhusi	0.498	2.055	1.003	0.526	0.648	0.477	0.824	1.557	0.411	2.451	2.04	0.017
C22	Qiongzhusi	0.443	1.489	1.003	0.797	0.591	0.206	0.7955	1.046	0.362	1.729	1.367	0.246
C23	Qiongzhusi	0.449	2.033	1.003	0.803	0.603	0.2	0.8015	1.584	0.367	2.395	2.028	0.188
C24	Qiongzhusi	0.57	1.553	1.003	0.861	0.718	0.142	0.859	0.983	0.477	1.893	1.416	-0.254
C25	Qiongzhusi	0.437	1.685	1.003	0.798	0.593	0.205	0.7965	1.248	0.356	1.993	1.637	0.114
C26	Qiongzhusi	0.607	1.521	1.003	0.857	0.711	0.146	0.8555	0.914	0.525	1.758	1.233	-0.375
C27	Qiongzhusi	0.553	1.862	1.003	0.855	0.707	0.148	0.8535	1.309	0.458	2.306	1.848	-0.44
C28	Qiongzhusi	0.502	1.668	1.003	0.84	0.677		0.8385	1.166	0.458	2.306	1.848	-0.019
C29	Qiongzhusi	0.452	1.565	1.003	0.804	0.604	0.199	0.802	1.113	0.369	1.875	1.506	-0.028
C30	Qiongzhusi	0.388	1.219	1.003	0.766	0.29	0.237	0.645	0.831	0.316	1.466	1.15	-0.043
M1	Longmaxi	0.39	1.848	1.003	0.748	0.532	0.255	0.766	1.458	0.317	2.213	1.896	-0.013
M2	Longmaxi	0.35	2.128	1.003	0.747	0.492	0.256	0.746	1.778	0.282	2.539	2.257	0.061
M3	Longmaxi	0.436	2.239	1.003	0.793	0.583	0.21	0.7915	1.803	0.357	2.741	2.384	-0.315
M4	Longmaxi	0.415	1.982	1.003	0.784	0.565	0.219	0.782	1.567	0.337	2.335	1.998	0.193
M5	Longmaxi	0.42	2.25	1.003	0.784	0.565	0.219	0.783	1.83	0.343	2.749	2.406	-0.284
M6	Longmaxi	0.436	2.042	1.003	0.792	0.581	0.211	0.791	1.606	0.357	2.5	2.143	-0.29
M7	Longmaxi	0.429	1.818	1.003	0.787	0.57	0.216	0.785	1.389	0.352	2.178	1.826	-0.027
M8	Longmaxi	0.406	2.269	1.003	0.774	0.545	0.229	0.772	1.863	0.332	2.781	2.449	-0.33
M9	Qiongzhusi	0.398	1.745	1.003	0.774	0.544	0.229	0.772	1.347	0.323	2.105	1.782	-0.082
M10	Qiongzhusi	0.437	2.173	1.003	0.794	0.585	0.209	0.793	1.736	0.357	2.648	2.291	-0.236
M11	Qiongzhusi	0.46	2.106	1.003	0.806	0.609	0.197	0.805	1.646	0.378	2.571	2.193	-0.269
M12	Qiongzhusi	0.433	2.005	1.003	0.79	0.576	0.213	0.788	1.572	0.355	2.432	2.077	-0.171
M13	Qiongzhusi	0.456	2.155	1.003	0.803	0.603	0.2	0.801	1.699	0.375	2.627	2.252	-0.253
M14	Qiongzhusi	0.424	2.177	1.003	0.789	0.574	0.214	0.787	1.753	0.345	2.584	2.239	0.113
M15	Qiongzhusi	0.461	2.091	1.003	0.807	0.61	0.196	0.805	1.63	0.379	2.526	2.147	-0.135
M16	Qiongzhusi	0.506	1.985	1.003	0.828	0.652	0.175	0.826	1.479	0.421	2.423	2.002	-0.281
M17	Qiongzhusi	0.548	1.881	1.003	0.848	0.692	0.155	0.846	1.333	0.46	2.275	1.815	-0.201
M18	Qiongzhusi	0.548	1.773	1.003	0.851	0.698	0.152	0.849	1.225	0.457	2.167	1.71	-0.285
M19	Qiongzhusi	0.524	2.127	1.003	0.837	0.671	0.166	0.836	1.603	0.436	2.592	2.156	-0.278
M20	Qiongzhusi	0.402	2.167	1.003	0.778	0.553	0.225	0.777	1.765	0.325	2.643	2.318	-0.233
M21	Qiongzhusi	0.438	2.31	1.003	0.795	0.587	0.208	0.793	1.872	0.357	2.809	2.452	-0.22
M22	Qiongzhusi	0.459	1.72	1.003	0.806	0.609	0.197	0.805	1.261	0.376	2.078	1.702	-0.119
M23	Qiongzhusi	0.515	1.814	1.003	0.841	0.679	0.162	0.84	1.299	0.431	2.201	1.77	-0.218
M24	Qiongzhusi	0.452	2.03	1.003	0.804	0.605	0.199	0.802	1.578	0.369	2.486	2.117	-0.286
M25	Qiongzhusi	0.455	2.329	1.003	0.804	0.605	0.199	0.802	1.874	0.373	2.84	2.467	-0.269
M26	Qiongzhusi	0.418	2.22	1.003	0.782	0.562	0.221	0.781	1.802	0.342	2.706	2.364	-0.247
M27	Qiongzhusi	0.443	2.134	1.003	0.798	0.592	0.205	0.796	1.691	0.362	2.556	2.194	-0.016
M28	Qiongzhusi	0.437	2.327	1.003	0.795	0.586	0.208	0.793	1.89	0.356	2.824	2.468	-0.19
M29	Qiongzhusi	0.384	2.231	1.003	0.766	0.528	0.237	0.764	1.847	0.311	2.719	2.408	-0.224
M30	Qiongzhusi	0.464	2.238	1.003	0.806	0.609	0.197	0.804	1.774	0.382	2.685	2.303	-0.052
M31	Qiongzhusi	0.462	2.354	1.003	0.809	0.614	0.194	0.807	1.892	0.378	2.809	2.431	0.037
M32	Qiongzhusi	0.452	2.011	1.003	0.805	0.607	0.198	0.803	1.559	0.368	2.453	2.085	-0.233
